# Supplementary material
Source: PubMed Central journal article supplement (PMC3813864)
Supplement: 6604ca1942bd4c221032781e2d5e2578_genetics.113.156679-2.pdf [file 6604ca1942bd4c221032781e2d5e2578_genetics.113.156679-2.pdf]

**Table S2 Origin of the Tex12 homologues**

| Species name          | Taxonomic rank | Accession number | sequence | Method/database | seed               | E-value |
|-----------------------|----------------|------------------|----------|-----------------|--------------------|---------|
| <i>M. musculus</i>    | Tetrapoda      | NP_079963        | complete | BLASTp /NCBI nr |                    | 0       |
| <i>S. boliviensis</i> | Tetrapoda      | XP_003923759     | complete | BLASTp /NCBI nr | <i>M. musculus</i> | 2e-60   |
| <i>C. griseus</i>     | Tetrapoda      | XP_003498567     | complete | BLASTp /NCBI nr | <i>M. musculus</i> | 2e-68   |
| <i>L. africana</i>    | Tetrapoda      | XP_003415682     | complete | BLASTp /NCBI nr | <i>M. musculus</i> | 3e-63   |
| <i>B. taurus</i>      | Tetrapoda      | NP_001029435     | complete | BLASTp /NCBI nr | <i>M. musculus</i> | 2e-63   |
| <i>M. mulatta</i>     | Tetrapoda      | NP_001181321     | complete | BLASTp /NCBI nr | <i>M. musculus</i> | 1e-61   |
| <i>O. garnettii</i>   | Tetrapoda      | XP_003794793     | complete | BLASTp /NCBI nr | <i>M. musculus</i> | 1e-59   |
| <i>O. cuniculus</i>   | Tetrapoda      | XP_002708480     | complete | BLASTp /NCBI nr | <i>M. musculus</i> | 7e-64   |
| <i>E. caballus</i>    | Tetrapoda      | XP_001501942     | complete | BLASTp /NCBI nr | <i>M. musculus</i> | 1e-63   |
| <i>P. abelii</i>      | Tetrapoda      | XP_002822521     | complete | BLASTp/NCBI nr  | <i>M. musculus</i> | 6e-62   |
| <i>H. sapiens</i>     | Tetrapoda      | NP_112565        | complete | BLASTp /NCBI nr | <i>M. musculus</i> | 9e-62   |
| <i>A. melanoleuca</i> | Tetrapoda      | XP_002921152     | complete | BLASTp /NCBI nr | <i>M. musculus</i> | 5e-61   |
| <i>S. scrofa</i>      | Tetrapoda      | XP_003357347     | complete | BLASTp /NCBI nr | <i>M. musculus</i> | 7e-63   |
| <i>C. porcellus</i>   | Tetrapoda      | XP_003472874     | complete | BLASTp /NCBI nr | <i>M. musculus</i> | 2e-57   |
| <i>R. norvegicus</i>  | Tetrapoda      | NP_001178035     | complete | BLASTp /NCBI nr | <i>M. musculus</i> | 1e-72   |

|                            |           |                    |          |                                  |                        |         |
|----------------------------|-----------|--------------------|----------|----------------------------------|------------------------|---------|
| <i>C. lupus</i>            | Tetrapoda | XP_854089          | complete | BLASTp/NCBI nr                   | <i>M. musculus</i>     | 2e-64   |
| <i>H. glaber</i>           | Tetrapoda | EHB18703           | complete | BLASTp/NCBI nr                   | <i>M. musculus</i>     | 7e-18   |
| <i>C. jacchus</i>          | Tetrapoda | XP_003734157       | complete | BLASTp/NCBI nr                   | <i>M. musculus</i>     | 3e-37   |
| <i>S. harrisii</i>         | Tetrapoda | XP_003764283       | complete | BLASTp/NCBI nr                   | <i>M. musculus</i>     | 1e-36   |
| <i>M. domestica</i>        | Tetrapoda | AAF03009835        | complete | tBLASTn/NCBI wsg                 | <i>S. harrisii</i>     | 2e-23   |
| <i>M. eugenii</i>          | Tetrapoda | ENSMEUP00000005950 | partial  | tBLASTn/Ensembl genomic sequence | <i>S. harrisii</i>     | 5.4e-59 |
| <i>M. gallopavo</i>        | Tetrapoda | XP_003212810       | complete | BLASTp/NCBI nr                   | <i>M. musculus</i>     | 3e-29   |
| <i>G. gallus</i>           | Tetrapoda | XP_001233099       | complete | BLASTp/NCBI nr                   | <i>M. musculus</i>     | 3e-27   |
| <i>T. guttata</i>          | Tetrapoda | ABQF01045735       | partial  | tBLASTn/NCBI wsg                 | <i>G. gallus</i>       | 7e-16   |
| <i>A. carolinensis</i>     | Tetrapoda | FG795025           | complete | tBLASTn/NCBI est                 | <i>O. niloticus</i>    | 1e-06   |
| <i>P. sinensis</i>         | Tetrapoda | AGCU01007591       | partial  | tBLASTn/NCBI wsg                 | <i>A. carolinensis</i> | 9e-12   |
| <i>P. molurus</i>          | Tetrapoda | AEQU010325864      | partial  | tBLASTn/NCBI wsg                 | <i>A. carolinensis</i> | 2e-16   |
| <i>C. mydas</i>            | Tetrapoda | AJIM01191925       | partial  | tBLASTn/NCBI wsg                 | <i>A. carolinensis</i> | 1e-12   |
| <i>C. picta</i>            | Tetrapoda | AHGY01090089       | partial  | tBLASTn/NCBI wsg                 | <i>A. carolinensis</i> | 3e-12   |
| <i>A. mississippiensis</i> | Tetrapoda | AKHW01088812       | partial  | tBLASTn/NCBI wsg                 | <i>A. carolinensis</i> | 1e-10   |
| <i>X. tropicalis</i>       | Tetrapoda | XP_002942798       | complete | BLASTp/NCBI nr                   | <i>M. musculus</i>     | 5e-15   |

|                        |                 |              |          |                  |                        |       |
|------------------------|-----------------|--------------|----------|------------------|------------------------|-------|
| <i>L. chalumnae</i>    | Coelacanth      | BAHO01008061 | partial  | tBLASTn/NCBI wsg | <i>A. carolinensis</i> | 8e-09 |
| <i>D. rerio</i>        | Actinopterygii  | XP_003200088 | complete | BLASTp/NCBI nr   | <i>M. musculus</i>     | 2e-10 |
| <i>A. fimbria</i>      | Actinopterygii  | ACQ58790     | complete | BLASTp/NCBI nr   | <i>M. musculus</i>     | 2e-08 |
| <i>O. niloticus</i>    | Actinopterygii  | XP_003453604 | complete | BLASTp/NCBI nr   | <i>M. musculus</i>     | 0,21  |
| <i>O. latipes</i>      | Actinopterygii  | FS551872     | complete | tBLASTn/NCBI est | <i>O. niloticus</i>    | 4e-39 |
| <i>T. nigroviridis</i> | Actinopterygii  | CR716219     | Complete | tBLASTn/NCBI nr  | <i>O. niloticus</i>    | 5e-22 |
| <i>R. rutilus</i>      | Actinopterygii  | EG548787     | complete | tBLASTn/NCBI est | <i>O. niloticus</i>    | 1e-21 |
| <i>P. promelas</i>     | Actinopterygii  | DT342891     | complete | tBLASTn/NCBI est | <i>O. niloticus</i>    | 5e-21 |
| <i>D. labrax</i>       | Actinopterygii  | FM002700     | complete | tBLASTn/NCBI est | <i>O. niloticus</i>    | 1e-41 |
| <i>O. mykiss</i>       | Actinopterygii  | CR370999     | complete | tBLASTn/NCBI est | <i>O. niloticus</i>    | 1e-26 |
| <i>I. furcatus</i>     | Actinopterygii  | FD158102     | complete | tBLASTn/NCBI est | <i>O. niloticus</i>    | 6e-11 |
| <i>G. morhua</i>       | Actinopterygii  | EY966699     | complete | tBLASTn/NCBI est | <i>O. niloticus</i>    | 3e-20 |
| <i>P. olivaceus</i>    | Actinopterygii  | CX286679     | complete | tBLASTn/NCBI est | <i>O. niloticus</i>    | 3e-18 |
| <i>S. salar</i>        | Actinopterygii  | CB508238     | partial  | tBLASTn/NCBI est | <i>O. niloticus</i>    | 2e-24 |
| <i>B. floridae</i>     | Cephalochordata | XP_002590156 | complete | BLASTp/NCBI nr   | <i>M. musculus</i>     | 0,15  |
| <i>S. purpuratus</i>   | Echinodermata   | AAGJ04009105 | partial  | tBLASTn/NCBI wsg | <i>A. pompejana</i>    | 0,35  |

|                     |          |              |          |                  |                    |       |
|---------------------|----------|--------------|----------|------------------|--------------------|-------|
| <i>C. teleta</i>    | Annelida | AMQN01002974 | partial  | tBLASTn/NCBI wsg | <i>L. gigantea</i> | 8e-05 |
| <i>A. pompejana</i> | Annelida | GO142621     | complete | tBLASTn/NCBI est | <i>G. gallus</i>   | 0,009 |
| <i>L. gigantea</i>  | Mollusca | AMQO01006439 | complete | tBLASTn/NCBI wsg | <i>B. floridae</i> | 2e-09 |
| <i>H. vulgaris</i>  | Cnidaria | CN567182     | complete | tBLASTn/NCBI est | <i>B. floridae</i> | 3e-09 |

---
