# Supplementary material
Source: PubMed Central journal article supplement (PMC3813864)
Supplement: bd192cb1a28d2375edc28536fe4ef81a_genetics.113.156679-1.pdf [file bd192cb1a28d2375edc28536fe4ef81a_genetics.113.156679-1.pdf]

>Mus\_musculus MATRPQPLGMEPEGSADLLHGPEGARGQYGSTQKIEDLMDMVKKLQKVGSLPFRIEVLINRINEVQQAkkKASEELGEAQTWVNDNLQKEL  
>Homo\_sapiens --MAGRSLTSKAEPETAGAVDRAEKAGGQDTSSQKIEDLMDMVKKLQKVGSLPFRVEVLINRINEVQQAkkKANKDLGEARTICEALQKEL  
>Canis\_lupus -----MVKKLQKAGSLPFRVEVLINRINEVQQAkkKASEELGEARTVWEALQKEM  
>Monodelphis\_domestica -----GGPDSSRNLEPFRIEGMINRINELQQAkkNANKELCETQAHRSQKEL  
>Sarcophilus\_harrisii -----KMEEMISIIISQLQAQRCTNEELQRNQLKMETLKEEL  
>Macropus\_eugenii -----RNPQFRLENMNRINELQQAkkIANKELCETQAHRSLEKEL  
>Ornithorhynchus\_anatinus -----MEKNQQDQRSLGLMREKAMEHTEYKVEADLVMLVEKLOKAGTLEPRIEDLIKIKDLQVRKKNANEELLKTRAHSEALQREL  
>Anolis\_carolinensis -----MAGAEGGIRKRTMEGNDPDPWDFSSKMEEILSLVKQMNVKLEPFRIEDLVKIKKLQQAkkKILSEELSEANEHSKSLQREL  
>Pelodiscus\_sinensis -----GTLEPRMDDLVGRLRKLQRAKQALSQELQDSQARSKELQEEL  
>Chelonia\_mydas -----MLFESNELPPSFASDICALHYAGTLEPRMDDLVGRLSRQLQRAKQALSQELHEGQARSEELQAEL  
>Xenopus\_tropicalis -----ESLTSLLRKLLEATDLEPKLEELLTDIKRVQEARCALSRLEQECCREQQGETAKREL  
>Latimeria\_chalumnae FELARVPLGGKAAAVGGLLFHPSGVRGNEESRLEEDLLKIVKELKQAGKTVPRIEELVKKLKLQQLQGGKNAVDEELCEARKCREALQKEL  
>Danio\_rerio -----MSELLESSFSIEDIIKT--SKSPDSRAELKPEELITQLRKLQVKKILEEEVTEVMLLKCARKQEE  
>Oryzias\_latipes -----MSTYSSLRQTNMNSQDGELOGSTNSGNLMGKLRRLQKGNRALGEEKELKLTSEALQKDL  
>Oreochromis\_niloticus -----MSDLEGFSDIEDMINVKPLRGGGELQEPKVEQLIGKLGRLKQGRALGEEIVKIKSVSDSLEKEL  
>Ictalurus\_punctatus -----TRPKPESTESSFNVEDVFRF--PQAPGREKDLKIEELLSKLRKLQVVKLVLEEEVKEALSICSTLRDED  
>Branchiostoma\_floridae (136)MDPDGMVALLDFFREDGVTPLYMLFFKDGLEEKFEGLVEARTMSVKEPFRVEDLLSSVRELO  
>Asterina\_pectinifera -----KNCESSALVNFSCIAFAWNLQRLSLLLQECVMIHLMGETTGPFTFGIDIKNKIKDLQEEKERNERKLSEARSKRKRLENKY  
>Capitella\_teleta -----DVRVDVIVNSLKLQQLQERSNLDTKLNELRRKRFVVEKNV  
>Crassostrea\_gigas -----TRPMAGNSSTFRVDLLHLSLKEIQEKNCLEHKLAEERRSRRELENLL  
>Lottia\_gigantea -----MAAVEQNFVRVETLLHNLKELQNEKTCLEQKLEQRKRDAERHF  
>Mytilus\_californianus -----KKSYLEQKLNERNRRRQLEQEL  
Consensus : : \*:\*:\*:::\*\*\*:::\*\*\*:::\*\*\*:::\*\*\*:::\*\*\*:::\*\*\*

>Mus\_musculus DLLREKVRLEKIDILNRKEETLRIMQLHCQEKESERQRK--HSMLEQCKERISFLNSQIDKEKAKLRKLRLDFFEHLETLMSEQHKTLEFHF  
>Homo\_sapiens DSLHGKVLKLEILSKQETLRILRLHCQEKESERHRK--HTMLQECKERISALNLQIEEEKNKQRQLRLAFAEQLEDLMGQHKDLWDFH  
>Canis\_lupus DSLSGEKVRLKEILNKKQETLRILRLHCQEKESERQRK--HTMLQECKERISALNSQIEEEKNKQRQLRLDFFEHLETLMGQHKDLWKFH  
>Monodelphis\_domestica EELSLEEAQLKEILNKKQETLRILRLHCQEKETEALRQ--QAVSEGCQRITELNSKIQEEKMKRRNQVVEFGQOLEEMMEKHKTLEWFH  
>Sarcophilus\_harrisii DKLNLEMIQLEETLNMKQGTLLLLQERRREEKALRQ--QTTSMECLQNVATLNAKIQEEKLRKKRKLKEFEQOLEELMQHKHELMEFH  
>Macropus\_eugenii DNLSEETQLKEILIEKQETLRILHLHCQEKETEALRH--QTVSEGYKKRITELNLSKIQEEKLKKRNQRMFEFGOLEEMMEKHKTLEWFH  
>Ornithorhynchus\_anatinus DELNAEKAHLEELNQQETLMMRLQCEKQAEARQ--QEVSQGCKQRIEELTSKIQEEKLKQRKQRMEFDQOLEEMMEKHKSLEWFH  
>Anolis\_carolinensis EKLNAEKSSLEEIWNEKKEETRVKMQFHCEETIKRQWQ--QKLNLECKQRIEAVTAKIQAEKRKQSKQRMEFEQLEELMEKHKLWELLY  
>Pelodiscus\_sinensis EERCFHPPSWEEICSQKQELRLTLQRLRSQETAEGQRLGCSGLTQERKQHIEELAAKIQEEKLKQRKHRLFEFQLLGELMGEHQSL----  
>Chelonia\_mydas EELNKEKSNLEEICSQKQEVRLTLQRLCQETEVARQ--QTLSDQRKQSIEELTAKIQEEKLKQRKQRYXXX-----  
>Xenopus\_tropicalis EELKAEKLQLEQTLTKNQET--LQLQCEKGAETRQ--KELSDCKQRIEGLTNQIQEEKLKRMMQRLBYEKQVEELMAKHKDLWELLY  
>Latimeria\_chalumnae DKLSAESFHLEETLNKKQETLQLLQFQYKERENEIKRQ--LNHSEGCQRVEQITSQIQEEKLKRKKQRMEFEMQLEELMEKHKSTWFEH  
>Danio\_rerio DALAAEALKLEGTLNKAEELNLSQLKCEDLQLEARQ--LEQNHQKEELVKQYSFQIQETKLRHKIRMKFENQLQQLTEQHKNSLAVF  
>Oryzias\_latipes DALQARTNQLEKDYKEKEELCRKLOFQYDKSEQDFERE--MKDHKMRKDLLEQYRCEIQEFKLRHKLKRMRFENQLQHLMEKHKLHCVF  
>Oreochromis\_niloticus ENLQTKVVFLEAIHKEKEETVCKLQFQCESEQDARQ--LQLNKKSEQLLEQYRYEIQDLKLRHKLRMRFEENQLQHLMEKHKLHCVF  
>Ictalurus\_punctatus NALTAELQLQGLILSEKEETCRSLQFKLEDLEQESQKQ--SELKQKQELVLYQYSQCIQETKLRHKIRMKFENQLQQLIGHKNFCTLF  
>Branchiostoma\_floridae -KVSQQHRQISVLYNKMVETLKIATAKHKVDQSQMADNQ--EQVNQDKRASLETENSSIEQEVQRQRQYSREFFESQLDELTDASHHAWLYF  
>Asterina\_pectinifera ETALSQKFNQATDTKAKMTDILKVAQYKVDQSQAAIEGQ--QSINQEVKQRVSHLKDCKMEERRQEEERELLEGLASLTELPHMGKDFY  
>Capitella\_teleta ESLTGRYLQHRDVSNSKLNLTQVAQKQVNNNTQQAIDAL--QKQCHAASKENQQLVDQAERTKSQEMEIMREFFENQIVNMIKFKYAQVFY  
>Crassostrea\_gigas DIENNKFTQMKEGHEKLEETMKVAQLKETQTQSMANRL--EESNQQRKKNIDEILNRKLSAEEKQLQNVENFEKELADIANQLMNARTFY



```
>Branchiostoma_floridae -----
>Asterina_pectinifera -----
>Capitella_teleta -----
>Crassostrea_gigas KLTTLKA-----
>Lottia_gigantea KLKESLE-----
>Mytilus_californianus LIEAI-----
Consensus :: ::::
```

**Figure S1** Multiple alignment of SYCE1 homologues. Positions kept for phylogenetic inferences are indicated in red.

```

>Mus_musculus      ---MADSDPGERSYDNMLKMLSDLNKDLEKLLLEEMEKIS--VQATMAYDMVMRTNPTLAESMRRLEDAFLNCKEEMEKN--QELLTETKRKQ----
>Homo_sapiens      ---MDADPEERNYDNMLKMLSDLNKDLEKLLLEEMEKIS--VQATMAYDMVMRTNPTLAESMRRLEDAFVNCKEEMEKN--QELLHETKQRL----
>Canis_lupus       ---MADSEPGERNYDNMLKMLSDLNKDLEKLLLEEMEKIS--VQATMAYDMVMRTNPTLAESMRRLEDAFLNCKEEMEKN--QELLNETKHKQ----
>Monodelphis_domestica -----XXXS--LQATMAYDMVMRTNPALADSMRRLEDAFLNCKEEMEKN--QELLNETKPKQ----
>Sarcophilus_harrisii -----XXXA--VQATMAYDMVMRTNPALADSMRRLEDAFLNCKEEMEKN--QELLNETKPKQ----
>Macropus_eugenii  ---QGDAKSGD-NYDNILKMLSN-----LKD LKME--NQATMAYDMVMRTNPALADSMRRLEDAFLNCKEEMEKN--QELLNETKPKP----
>Ornithorhynchus_anatinus ---MAETDPGERSYD-MPKSLSDLNRDLENLLEEMEKIS--VQATMAYDMVMRTNPTLADTLRRLEGSFLDCKEEMEKN--QALLQETQSAPSR--
>Gallus_gallus     ---MARQEPQERNYDNMLKMVEDLNRDLEKLLLEEIEKLT--VQATMAYDMVMRTNPDLTNSMRRLEDAFLNCKEEMEKK--QEVLRRESKGEQKK--
>Taeniopygia_guttata ---MDESSEQKENYNEGKMVENFNMDMEELLEDMEKLT--VRAAMAYDYVAIQTNPGPYNAQHLEDAFLMCKEQMEKK--QEVLLFRGEGQKK--
>Meleagris_gallopavo ---MARQEPQERNYDNMLKMIEDLNRDLEKLLLEEMEKLT--VQATMAYDMVMRTNPDLTNSMRHLEDAFLNCKEEMEKK--QEVLRRESKGEQKK--
>Anolis_carolinensis ---MAKCEYERNYDNIVKQLEDLNRDLEKLLLEDMEKLSIPVQATMAYDMVMRTNPELANSMRRLEDAFLTCKEEMERN--QEMLKETKGAEQRP--
>Pelodiscus_sinensis ---MAKSEPEERNYDNMVKMLEDLNRDLEKLLLEEMEKLSVAVQATMAYDMVMRTNPDLANSMRQLEDAFLNCKEEMEKN--KEMLKETKGNEQKQ--
>Chelonia_mydas    ---MAKSEPREERNYDNMVKMLEDLNRDLEKLLLEEMEKLSVAVQATMAYDMVMRTNPDLANSMRRLEDAFLNCKEEMEKN--QEMLKETKGTEQKQ--
>Chrysemys_picta   ---MAKSEPEERNYDNMVKMLEDLNRDLEKLLLEEMEKLSVAVQATMAYDMVMRTNPDLANSMRRLEDAFLNCKEEMEKN--QEMLKETKGTEQKQ--
>Python_molurus    -----VS--VQATMAYDMVMRTNPDLANSMRRLEDAFLTCKEEMEKN--QEMLKETKGAEQPK--
>Alligator_mississippiensis ---MAKSEPEERNCDNMVKMLEDLNRDLEKLLLEEMEKLSVAVQATMAYDMVMRTNPDLANSMRRLEDAFLNCKEEMEKN--QEMLKETKDGGEKK--
>Xenopus_tropicalis ---MAEPETSVQSSQEDVSRMLRDLNDDLENMKEKMETLS--VRTTEMAYDMVLRTPALAQSMKRLDAFFKCRREEIEKN--QEMLEETKQKTKPEP--
>Latimeria_chalumnae ---MAESELCEKKHDNIIKMLCDLNRDLEKMLEDIKISGRVQATMAYDMVMRTNPELTDMSKRLDAFLNCKEEVERN--QEMLSETKGNO----
>Danio_rerio       ---MSGGLSDVQLCEDFSSESLLQNLQHLEKMTQMEDVVS--VKLSCMTMDMVLRTSPDLSESFKSLENEFQKCKAVLCGL--TDGQEVKCHPADEEQV
>Oryzias_latipes   (4)MSDSSASSELPG-SNDDVLELNKLERMVEDTENMS--AQLTMAAYDMVALRTNPEEGASMRQLEEAYQRCRAAVFGDSAPEPEGETDSASAKP--
>Oreochromis_niloticus ---MADSSARSELPRISDDDKLEMNKLERMIEDVESMS--AHLTMAAYDMVALRTSPELGASMQKLEAYLKCRAAVCGD--PDQESQIDKYAETAVT
>Tetraodon_nigroviridis ---MS-----ELTEDLERMTEHTEKMS--LQLTMAHDLVLRASPELASSMRKLEDAYRGCRAAVCGD--PEPDKSPAAPGAQP--
>Ictalurus_punctatus ---MVDNASAGEQYEDFGRETLECSKDLEKMTQMEKIS--VNVTMATMDMVLRTDPQLKSLKRLKNEFVQCKAVICGS--GDNLVQDRIVANQKT--
Consensus          *::: :::: :::: :::: :::: :::: :::: :::: :::: :::: :::: :::: :::: :::: :::: :::: :::: :::: :::: :::: :::: :::: ::::

```

```

>Mus_musculus      -----
>Homo_sapiens      -----
>Canis_lupus       -----
>Monodelphis_domestica -----
>Sarcophilus_harrisii -----
>Macropus_eugenii  -----
>Ornithorhynchus_anatinus -----
>Gallus_gallus     -----E
>Taeniopygia_guttata -----E
>Meleagris_gallopavo -----E
>Anolis_carolinensis -----E
>Pelodiscus_sinensis -----E
>Chelonia_mydas    -----E
>Chrysemys_picta   -----E
>Python_molurus    -----
>Alligator_mississippiensis -----E
>Xenopus_tropicalis EANTD
>Latimeria_chalumnae -----
>Danio_rerio       SPKTN

```

```
>Oryzias_latipes          --TEM
>Oreochromis_niloticus   TLSQM
>Tetraodon_nigroviridis  ----D
>Ictalurus_punctatus     --TQE
Consensus
```

**Figure S2** Multiple alignment of SYCE3 homologues. Positions kept for phylogenetic inferences are indicated in red.

**Table S1 Origin of the SYCE2 homologues**

| Species name          | Taxonomic rank | Accession number | sequence | Method/database | seed               | E-value |
|-----------------------|----------------|------------------|----------|-----------------|--------------------|---------|
| <i>M. musculus</i>    | Tetrapoda      | NP_082230        | complete | BLASTp/ NCBI nr |                    | 0       |
| <i>P. paniscus</i>    | Tetrapoda      | XP_003814885     | complete | BLASTp /NCBI nr | <i>M. musculus</i> | 1e-70   |
| <i>R. norvegicus</i>  | Tetrapoda      | EDL92193         | complete | BLASTp /NCBI nr | <i>M. musculus</i> | 5e-123  |
| <i>H. sapiens</i>     | Tetrapoda      | NP_001099048     | complete | BLASTp /NCBI nr | <i>M. musculus</i> | 1e-70   |
| <i>P. troglodytes</i> | Tetrapoda      | XP_0011155819    | complete | BLASTp /NCBI nr | <i>M. musculus</i> | 1e-70   |
| <i>P. abelii</i>      | Tetrapoda      | XP_002828793     | complete | BLASTp /NCBI nr | <i>M. musculus</i> | 4e-71   |
| <i>P. anubis</i>      | Tetrapoda      | XP_003915053     | complete | BLASTp /NCBI nr | <i>M. musculus</i> | 5e-70   |
| <i>N. leucogenys</i>  | Tetrapoda      | XP_003256956     | complete | BLASTp /NCBI nr | <i>M. musculus</i> | 2e-70   |
| <i>L. africana</i>    | Tetrapoda      | XP_003413389     | complete | BLASTp /NCBI nr | <i>M. musculus</i> | 8e-75   |
| <i>S. boliviensis</i> | Tetrapoda      | XP_003941778     | complete | BLASTp /NCBI nr | <i>M. musculus</i> | 2e-69   |
| <i>C. jacchus</i>     | Tetrapoda      | XP_002761833     | complete | BLASTp /NCBI nr | <i>M. musculus</i> | 1e-66   |
| <i>C. lupus</i>       | Tetrapoda      | XP_542039        | complete | BLASTp /NCBI nr | <i>M. musculus</i> | 2e-73   |
| <i>B. taurus</i>      | Tetrapoda      | DAA28039         | complete | BLASTp /NCBI nr | <i>M. musculus</i> | 4e-74   |
| <i>M. mulatta</i>     | Tetrapoda      | XP_002801138     | complete | BLASTp /NCBI nr | <i>M. musculus</i> | 1e-54   |
| <i>C. porcellus</i>   | Tetrapoda      | XP_003468209     | complete | BLASTp /NCBI nr | <i>M. musculus</i> | 7e-58   |

|                            |           |                    |          |                   |                        |         |
|----------------------------|-----------|--------------------|----------|-------------------|------------------------|---------|
| <i>O. cuniculus</i>        | Tetrapoda | XP_002724280       | complete | BLASTp /NCBI nr   | <i>M. usculus</i>      | 1e-64   |
| <i>S. scrofa</i>           | Tetrapoda | XP_003480827       | complete | BLASTp /NCBI nr   | <i>M. musculus</i>     | 4e-63   |
| <i>C. griseus</i>          | Tetrapoda | EGW00612           | partial  | BLASTp /NCBI nr   | <i>M. musculus</i>     | 2e-45   |
| <i>A. melanoleuca</i>      | Tetrapoda | EFB28619           | Complete | BLASTp /NCBI nr   | <i>M. musculus</i>     | 4e-65   |
| <i>M. putorius</i>         | Tetrapoda | AES07688           | Complete | BLASTp /NCBI nr   | <i>M. musculus</i>     | 2e-64   |
| <i>O. garnettii</i>        | Tetrapoda | XP_003798068       | partial  | BLASTp /NCBI nr   | <i>M. musculus</i>     | 1e-39   |
| <i>M. domestica</i>        | Tetrapoda | XP_001377747       | complete | BLASTp /NCBI nr   | <i>M. musculus</i>     | 6e-57   |
| <i>S. harrisii</i>         | Tetrapoda | XP_003760717       | complete | BLASTp /NCBI nr   | <i>M. musculus</i>     | 4e-56   |
| <i>M. eugenii</i>          | Tetrapoda | ABQO021047289      | partial  | tBLASTn/NCBI wgs  | <i>S. harrisii</i>     | 3e-41   |
| <i>O. anatinus</i>         | Tetrapoda | ENSOANP00000014450 | partial  | BLASTp/UniProtKB  | <i>M. musculus</i>     | 2x10-5  |
| <i>G. gallus</i>           | Tetrapoda | XP_003643433       | complete | BLASTp /NCBI nr   | <i>M. musculus</i>     | 1e-37   |
| <i>T. guttata</i>          | Tetrapoda | XP_002194928       | partial  | BLASTp /NCBI nr   | <i>M. musculus</i>     | 4e-15   |
| <i>A. carolinensis</i>     | Tetrapoda | XP_003216437       | complete | BLASTp /NCBI nr   | <i>M. musculus</i>     | 6e-36   |
| <i>P. sinensis</i>         | Tetrapoda | ENSPSIP00000014147 | partial  | BLASTp/ UniProtKB | <i>A. carolinensis</i> | 9x10-31 |
| <i>P. molurus</i>          | Tetrapoda | AEQU010394814      | partial  | tBLASTn/NCBI wgs  | <i>A. carolinensis</i> | 3e-30   |
| <i>A. mississippiensis</i> | Tetrapoda | AKHW01024067       | partial  | tBLASTn/NCBI wgs  | <i>A. carolinensis</i> | 2e-18   |

|                        |                 |                            |          |                                       |                                        |         |
|------------------------|-----------------|----------------------------|----------|---------------------------------------|----------------------------------------|---------|
| <i>C. mydas</i>        | Tetrapoda       | EMP37242                   | complete | BLASTp /NCBI nr                       | <i>A. carolinensis</i>                 | 3e-23   |
| <i>C. picta</i>        | Tetrapoda       | AHGY01185898               | partial  | tBLASTn/NCBI wgs                      | <i>A. carolinensis</i>                 | 1e-21   |
| <i>X. tropicalis</i>   | Tetrapoda       | XP_002939167               | partial  | BLASTp /NCBI nr                       | <i>M. musculus</i>                     | 1e-19   |
| <i>L. chalunnae</i>    | Coelacanth      | AFYH01158832               | partial  | tBLASTn/NCBI wgs                      | <i>A. carolinensis</i>                 | 8e-17   |
| <i>D. rerio</i>        | Actinopterygii  | NP_001018339               | complete | BLASTp /NCBI nr                       | <i>M. musculus</i>                     | 2e-11   |
| <i>O. mykiss</i>       | Actinopterygii  | BX_298349                  | complete | tBLASTn/Gene Indices                  | <i>D. rerio</i>                        | 1,6e-44 |
| <i>O. latipes</i>      | Actinopterygii  | FS528043                   | complete | tBLASTn/Gene Indices                  | <i>D. rerio</i>                        | 1,1e-22 |
| <i>O. niloticus</i>    | Actinopterygii  | XP_003453800               | complete | BLASTp /NCBI nr                       | <i>M. musculus</i>                     | 2e-06   |
| <i>T. nigroviridis</i> | Actinopterygii  | CAG03308                   | complete | BLASTp /NCBI nr                       | <i>M. musculus</i>                     | 6e-10   |
| <i>B. floridae</i>     | Cephalochordata | XP_002591412               | complete | BLASTp /NCBI nr                       | <i>M. musculus</i>                     | 8e-15   |
| <i>C. savignyi</i>     | Tunicata        | BW516106                   | complete | tBLASTn/NCBI est                      | <i>H. diversicolor</i>                 | 2e-09   |
| <i>C. intestinalis</i> | Tunicata        | XP_002130896               | complete | BLASTp /NCBI nr                       | <i>M. musculus</i>                     | 0,008   |
| <i>P. misakiensis</i>  | Tunicata        | AU036426                   | complete | tBLASTn/NCBI est                      | <i>H. diversicolor</i>                 | 2e-06   |
| <i>S. purpuratus</i>   | Echinodermata   | XP_003726746               | complete | BLASTp /NCBI nr                       | <i>M. musculus</i>                     | 1e-13   |
| <i>A. pompejana</i>    | Annelida        | GO169636                   | complete | tBLASTn/NCBI est                      | <i>L. gigantea</i>                     | 2e-14   |
| <i>C. teleta</i>       | Annelida        | Jgi 210482<br>AMQN01004103 | complete | Blastp/InParanoid<br>tBLASTn/NCBI wgs | <i>M. musculus</i><br><i>C. teleta</i> | 4,9e-06 |



|                          |           |                            |          |                                                       |                                          |         |
|--------------------------|-----------|----------------------------|----------|-------------------------------------------------------|------------------------------------------|---------|
| <i>S. nudus</i>          | Annelida  | FR768618                   | complete | tBLASTn/ <i>NCBI</i> est                              | <i>L. gigantea</i>                       | 2e-23   |
| <i>L. stagnalis</i>      | Mollusca  | ES573602                   | complete | tBLASTn/ <i>NCBI</i> est                              | <i>L. gigantea</i>                       | 1e-09   |
| <i>L. gigantea</i>       | Mollusca  | jgi 158004<br>AMQO01001743 | complete | Blastp/ <i>InParanoid</i><br>tBLASTn/ <i>NCBI</i> wgs | <i>M. musculus</i><br><i>L. gigantea</i> | 1,8e-08 |
| <i>C. gigas</i>          | Mollusca  | EKC37702                   | complete | BLASTp / <i>NCBI</i> nr                               | <i>M. musculus</i>                       | 1e-04   |
| <i>H. diversicolor</i>   | Mollusca  | GT866818                   | complete | tBLASTn/ <i>NCBI</i> est                              | <i>L. gigantea</i>                       | 2e-32   |
| <i>D. pulex</i>          | Crustacea | EFX69051                   | complete | Hmmsearch/ <i>NCBI</i> est                            | <i>hmmprofil</i>                         | 0,023   |
| <i>H. magnipapillata</i> | Cnidaria  | XP_002165182               | complete | BLASTp / <i>NCBI</i> nr                               | <i>M. musculus</i>                       | 5e-06   |
| <i>N. vectensis</i>      | Cnidaria  | XP_001625149               | complete | BLASTp / <i>NCBI</i> nr                               | <i>M. musculus</i>                       | 2e-11   |

---

**Table S2 Origin of the Tex12 homologues**

| Species name          | Taxonomic rank | Accession number | sequence | Method/database | seed               | E-value |
|-----------------------|----------------|------------------|----------|-----------------|--------------------|---------|
| <i>M. musculus</i>    | Tetrapoda      | NP_079963        | complete | BLASTp /NCBI nr |                    | 0       |
| <i>S. boliviensis</i> | Tetrapoda      | XP_003923759     | complete | BLASTp /NCBI nr | <i>M. musculus</i> | 2e-60   |
| <i>C. griseus</i>     | Tetrapoda      | XP_003498567     | complete | BLASTp /NCBI nr | <i>M. musculus</i> | 2e-68   |
| <i>L. africana</i>    | Tetrapoda      | XP_003415682     | complete | BLASTp /NCBI nr | <i>M. musculus</i> | 3e-63   |
| <i>B. taurus</i>      | Tetrapoda      | NP_001029435     | complete | BLASTp /NCBI nr | <i>M. musculus</i> | 2e-63   |
| <i>M. mulatta</i>     | Tetrapoda      | NP_001181321     | complete | BLASTp /NCBI nr | <i>M. musculus</i> | 1e-61   |
| <i>O. garnettii</i>   | Tetrapoda      | XP_003794793     | complete | BLASTp /NCBI nr | <i>M. musculus</i> | 1e-59   |
| <i>O. cuniculus</i>   | Tetrapoda      | XP_002708480     | complete | BLASTp /NCBI nr | <i>M. musculus</i> | 7e-64   |
| <i>E. caballus</i>    | Tetrapoda      | XP_001501942     | complete | BLASTp /NCBI nr | <i>M. musculus</i> | 1e-63   |
| <i>P. abelii</i>      | Tetrapoda      | XP_002822521     | complete | BLASTp/NCBI nr  | <i>M. musculus</i> | 6e-62   |
| <i>H. sapiens</i>     | Tetrapoda      | NP_112565        | complete | BLASTp /NCBI nr | <i>M. musculus</i> | 9e-62   |
| <i>A. melanoleuca</i> | Tetrapoda      | XP_002921152     | complete | BLASTp /NCBI nr | <i>M. musculus</i> | 5e-61   |
| <i>S. scrofa</i>      | Tetrapoda      | XP_003357347     | complete | BLASTp /NCBI nr | <i>M. musculus</i> | 7e-63   |
| <i>C. porcellus</i>   | Tetrapoda      | XP_003472874     | complete | BLASTp /NCBI nr | <i>M. musculus</i> | 2e-57   |
| <i>R. norvegicus</i>  | Tetrapoda      | NP_001178035     | complete | BLASTp /NCBI nr | <i>M. musculus</i> | 1e-72   |

|                            |           |                    |          |                                  |                        |         |
|----------------------------|-----------|--------------------|----------|----------------------------------|------------------------|---------|
| <i>C. lupus</i>            | Tetrapoda | XP_854089          | complete | BLASTp/NCBI nr                   | <i>M. musculus</i>     | 2e-64   |
| <i>H. glaber</i>           | Tetrapoda | EHB18703           | complete | BLASTp/NCBI nr                   | <i>M. musculus</i>     | 7e-18   |
| <i>C. jacchus</i>          | Tetrapoda | XP_003734157       | complete | BLASTp/NCBI nr                   | <i>M. musculus</i>     | 3e-37   |
| <i>S. harrisii</i>         | Tetrapoda | XP_003764283       | complete | BLASTp/NCBI nr                   | <i>M. musculus</i>     | 1e-36   |
| <i>M. domestica</i>        | Tetrapoda | AAFR03009835       | complete | tBLASTn/NCBI wsg                 | <i>S. harrisii</i>     | 2e-23   |
| <i>M. eugenii</i>          | Tetrapoda | ENSMEUP00000005950 | partial  | tBLASTn/Ensembl genomic sequence | <i>S. harrisii</i>     | 5.4e-59 |
| <i>M. gallopavo</i>        | Tetrapoda | XP_003212810       | complete | BLASTp/NCBI nr                   | <i>M. musculus</i>     | 3e-29   |
| <i>G. gallus</i>           | Tetrapoda | XP_001233099       | complete | BLASTp/NCBI nr                   | <i>M. musculus</i>     | 3e-27   |
| <i>T. guttata</i>          | Tetrapoda | ABQF01045735       | partial  | tBLASTn/NCBI wsg                 | <i>G. gallus</i>       | 7e-16   |
| <i>A. carolinensis</i>     | Tetrapoda | FG795025           | complete | tBLASTn/NCBI est                 | <i>O. niloticus</i>    | 1e-06   |
| <i>P. sinensis</i>         | Tetrapoda | AGCU01007591       | partial  | tBLASTn/NCBI wsg                 | <i>A. carolinensis</i> | 9e-12   |
| <i>P. molurus</i>          | Tetrapoda | AEQU010325864      | partial  | tBLASTn/NCBI wsg                 | <i>A. carolinensis</i> | 2e-16   |
| <i>C. mydas</i>            | Tetrapoda | AJIM01191925       | partial  | tBLASTn/NCBI wsg                 | <i>A. carolinensis</i> | 1e-12   |
| <i>C. picta</i>            | Tetrapoda | AHGY01090089       | partial  | tBLASTn/NCBI wsg                 | <i>A. carolinensis</i> | 3e-12   |
| <i>A. mississippiensis</i> | Tetrapoda | AKHW01088812       | partial  | tBLASTn/NCBI wsg                 | <i>A. carolinensis</i> | 1e-10   |
| <i>X. tropicalis</i>       | Tetrapoda | XP_002942798       | complete | BLASTp/NCBI nr                   | <i>M. musculus</i>     | 5e-15   |

|                        |                 |              |          |                  |                        |       |
|------------------------|-----------------|--------------|----------|------------------|------------------------|-------|
| <i>L. chalumnae</i>    | Coelacanth      | BAHO01008061 | partial  | tBLASTn/NCBI wsg | <i>A. carolinensis</i> | 8e-09 |
| <i>D. rerio</i>        | Actinopterygii  | XP_003200088 | complete | BLASTp/NCBI nr   | <i>M. musculus</i>     | 2e-10 |
| <i>A. fimbria</i>      | Actinopterygii  | ACQ58790     | complete | BLASTp/NCBI nr   | <i>M. musculus</i>     | 2e-08 |
| <i>O. niloticus</i>    | Actinopterygii  | XP_003453604 | complete | BLASTp/NCBI nr   | <i>M. musculus</i>     | 0,21  |
| <i>O. latipes</i>      | Actinopterygii  | FS551872     | complete | tBLASTn/NCBI est | <i>O. niloticus</i>    | 4e-39 |
| <i>T. nigroviridis</i> | Actinopterygii  | CR716219     | Complete | tBLASTn/NCBI nr  | <i>O. niloticus</i>    | 5e-22 |
| <i>R. rutilus</i>      | Actinopterygii  | EG548787     | complete | tBLASTn/NCBI est | <i>O. niloticus</i>    | 1e-21 |
| <i>P. promelas</i>     | Actinopterygii  | DT342891     | complete | tBLASTn/NCBI est | <i>O. niloticus</i>    | 5e-21 |
| <i>D. labrax</i>       | Actinopterygii  | FM002700     | complete | tBLASTn/NCBI est | <i>O. niloticus</i>    | 1e-41 |
| <i>O. mykiss</i>       | Actinopterygii  | CR370999     | complete | tBLASTn/NCBI est | <i>O. niloticus</i>    | 1e-26 |
| <i>I. furcatus</i>     | Actinopterygii  | FD158102     | complete | tBLASTn/NCBI est | <i>O. niloticus</i>    | 6e-11 |
| <i>G. morhua</i>       | Actinopterygii  | EY966699     | complete | tBLASTn/NCBI est | <i>O. niloticus</i>    | 3e-20 |
| <i>P. olivaceus</i>    | Actinopterygii  | CX286679     | complete | tBLASTn/NCBI est | <i>O. niloticus</i>    | 3e-18 |
| <i>S. salar</i>        | Actinopterygii  | CB508238     | partial  | tBLASTn/NCBI est | <i>O. niloticus</i>    | 2e-24 |
| <i>B. floridae</i>     | Cephalochordata | XP_002590156 | complete | BLASTp/NCBI nr   | <i>M. musculus</i>     | 0,15  |
| <i>S. purpuratus</i>   | Echinodermata   | AAGJ04009105 | partial  | tBLASTn/NCBI wsg | <i>A. pompejana</i>    | 0,35  |

|                     |          |              |          |                  |                    |       |
|---------------------|----------|--------------|----------|------------------|--------------------|-------|
| <i>C. teleta</i>    | Annelida | AMQN01002974 | partial  | tBLASTn/NCBI wsg | <i>L. gigantea</i> | 8e-05 |
| <i>A. pompejana</i> | Annelida | GO142621     | complete | tBLASTn/NCBI est | <i>G. gallus</i>   | 0,009 |
| <i>L. gigantea</i>  | Mollusca | AMQO01006439 | complete | tBLASTn/NCBI wsg | <i>B. floridae</i> | 2e-09 |
| <i>H. vulgaris</i>  | Cnidaria | CN567182     | complete | tBLASTn/NCBI est | <i>B. floridae</i> | 3e-09 |

---

**Table S3 Origin of the SYCE1 homologues**

| Species name          | Taxonomic rank | Accession number | sequence | Method/database | seed               | E-value |
|-----------------------|----------------|------------------|----------|-----------------|--------------------|---------|
| <i>M. musculus</i>    | Tetrapoda      | NP_001137237     | complete | BLASTp/NCBI nr  |                    | 0       |
| <i>R. norvegicus</i>  | Tetrapoda      | NP_001020229     | complete | BLASTp /NCBI nr | <i>M. musculus</i> | 0       |
| <i>H. sapiens</i>     | Tetrapoda      | NP_001137236     | complete | BLASTp/NCBI nr  | <i>M. musculus</i> | 7e-119  |
| <i>P. troglodytes</i> | Tetrapoda      | XP_001146521     | complete | BLASTp /NCBI nr | <i>M. musculus</i> | 1e-117  |
| <i>P. abelii</i>      | Tetrapoda      | XP_002821352     | complete | BLASTp /NCBI nr | <i>M. musculus</i> | 1e-120  |
| <i>C. porcellus</i>   | Tetrapoda      | XP_003479623     | complete | BLASTp/NCBI nr  | <i>M. musculus</i> | 2e-144  |
| <i>N. leucogenys</i>  | Tetrapoda      | XP_003275547     | complete | BLASTp /NCBI nr | <i>M. musculus</i> | 6e-117  |
| <i>P. paniscus</i>    | Tetrapoda      | XP_003805584     | complete | BLASTp /NCBI nr | <i>M. musculus</i> | 2e-115  |
| <i>A. melanoleuca</i> | Tetrapoda      | XP_002928741     | complete | BLASTp /NCBI nr | <i>M. musculus</i> | 1e-138  |
| <i>C. griseus</i>     | Tetrapoda      | XP_003514379     | complete | BLASTp /NCBI nr | <i>M. musculus</i> | 4e-169  |
| <i>L. africana</i>    | Tetrapoda      | XP_003423552     | complete | BLASTp /NCBI nr | <i>M. musculus</i> | 3e-122  |
| <i>M. mulatta</i>     | Tetrapoda      | XP_002805923     | complete | BLASTp /NCBI nr | <i>M. musculus</i> | 4e-116  |
| <i>E. caballus</i>    | Tetrapoda      | XP_001497316     | complete | BLASTp /NCBI nr | <i>M. musculus</i> | 1e-126  |
| <i>P. anubis</i>      | Tetrapoda      | XP_003904501     | complete | BLASTp /NCBI nr | <i>M. musculus</i> | 2e-120  |
| <i>O. cuniculus</i>   | Tetrapoda      | XP_002718820     | complete | BLASTp /NCBI nr | <i>M. musculus</i> | 2e-123  |

|                        |            |                    |          |                   |                        |         |
|------------------------|------------|--------------------|----------|-------------------|------------------------|---------|
| <i>B. taurus</i>       | Tetrapoda  | NP_001033238       | complete | BLASTp /NCBI nr   | <i>M. musculus</i>     | 5e-128  |
| <i>C. lupus</i>        | Tetrapoda  | XP_537943          | complete | BLASTp /NCBI nr   | <i>M. musculus</i>     | 4e-144  |
| <i>O. garnettii</i>    | Tetrapoda  | XP_003803715       | complete | BLASTp /NCBI nr   | <i>M. musculus</i>     | 7e-140  |
| <i>M. fascicularis</i> | Tetrapoda  | Q4R7J8             | complete | BLASTp /NCBI nr   | <i>M. musculus</i>     | 3e-101  |
| <i>H. glaber</i>       | Tetrapoda  | EHB13133           | complete | BLASTp /NCBI nr   | <i>M. musculus</i>     | 1e-94   |
| <i>M. domestica</i>    | Tetrapoda  | ADB77889           | complete | BLASTp /NCBI nr   | <i>M. musculus</i>     | 4e-55   |
| <i>S. harrisii</i>     | Tetrapoda  | ENSSHAP00000009845 | partial  | BLASTp /UniProtKB | <i>M. domestica</i>    | 1x10-52 |
| <i>M. eugenii</i>      | Tetrapoda  | FY576800           | complete | tBLASTn/NCBI est  | <i>M. domestica</i>    | 7e-109  |
| <i>S. boliviensis</i>  | Tetrapoda  | XP_003938136       | complete | BLASTp /NCBI nr   | <i>M. musculus</i>     | 3e-38   |
| <i>C. jacchus</i>      | Tetrapoda  | XP_003735392       | complete | BLASTp /NCBI nr   | <i>M. musculus</i>     | 2e-39   |
| <i>O. anatinus</i>     | Tetrapoda  | ENSOANP00000022990 | complete | BLASTp/ UniProtKB | <i>M. domestica</i>    | 4x10-76 |
| <i>A. carolinensis</i> | Tetrapoda  | XP_003216702       | complete | BLASTp /NCBI nr   | <i>M. musculus</i>     | 5e-44   |
| <i>C. mydas</i>        | Tetrapoda  | EMP26554           | partial  | BLASTp/NCBI nr    | <i>A. carolinensis</i> | 6e-33   |
| <i>P. sinensis</i>     | Tetrapoda  | ENSPSIP00000010027 | partial  | BLASTp/UniProtKB  | <i>A. carolinensis</i> | 2x10-38 |
| <i>X. tropicalis</i>   | Tetrapoda  | XP_002943661       | complete | BLASTp /NCBI nr   | <i>M. musculus</i>     | 3e-20   |
| <i>L. chalumnea</i>    | Coelacanth | H3ALY1             | complete | Hmmsearch/UniProt | <i>hmmprofil</i>       | 8,7e-77 |

|                         |                 |                            |          |                                       |                                          |       |
|-------------------------|-----------------|----------------------------|----------|---------------------------------------|------------------------------------------|-------|
| <i>P. reticulata</i>    | Actinopterygii  | ES386322                   | complete | tBLASTn/NCBI est                      | <i>O. latipes</i>                        | 2e-49 |
| <i>R. rutilus</i>       | Actinopterygii  | EG545611                   | complete | tBLASTn/NCBI est                      | <i>O. latipes</i>                        | 3e-36 |
| <i>I. punctatus</i>     | Actinopterygii  | CK426085                   | complete | tBLASTn/NCBI est                      | <i>O. latipes</i>                        | 3e-31 |
| <i>P. promelas</i>      | Actinopterygii  | DT113652                   | partial  | tBLASTn/NCBI est                      | <i>O. latipes</i>                        | 2e-23 |
| <i>S. maximus</i>       | Actinopterygii  | HQ603845                   | partial  | tBLASTn/NCBI est                      | <i>O. latipes</i>                        | 3e-23 |
| <i>P. maniculatus</i>   | Actinopterygii  | GH530402                   | complete | tBLASTn/NCBI est                      | <i>O. latipes</i>                        | 3e-09 |
| <i>O. niloticus</i>     | Actinopterygii  | XP_003444205               | complete | BLASTp /NCBI nr                       | <i>M. musculus</i>                       | 1e-17 |
| <i>D. rerio</i>         | Actinopterygii  | XP_694355                  | complete | tBLASTn/NCBI est                      | <i>M. musculus</i>                       | 5e-14 |
| <i>O. latipes</i>       | Actinopterygii  | XP_004074263               | complete | BLASTp/NCBI nr                        | <i>D. rerio</i>                          | 1e-32 |
| <i>B. floridae</i>      | Cephalochordata | XP_002592847               | complete | tBLASTn/NCBI nr                       | <i>O. latipes</i>                        | 0,16  |
| <i>A. pectinifera</i>   | Echinodermata   | DB424359                   | complete | tBLASTn/NCBI est                      | <i>L. gigantea</i>                       | 1e-12 |
| <i>C. teleta</i>        | Annelida        | AMQN01011277               | complete | tBLASTn/NCBI wsg                      | <i>L. gigantea</i>                       | 2e-12 |
| <i>M. californianus</i> | Mollusca        | ES407417                   | partial  | tBLASTn/NCBI est                      | <i>B. floridae</i>                       | 1e-10 |
| <i>L. gigantea</i>      | Mollusca        | jgi 156257<br>AMQQ01001205 | complete | Blastp/InParanoid<br>tBLASTn/NCBI wsg | <i>M. musculus</i><br><i>L. gigantea</i> | <0,01 |
| <i>C. gigas</i>         | Mollusca        | AM858590                   | complete | tBLASTn/NCBI est                      | <i>L. gigantea</i>                       | 3e-48 |



**Table S4 Origin of the SYCE3 homologues**

| Species name          | Taxonomic rank | Accession number | sequence | Method/database | seed               | E-value |
|-----------------------|----------------|------------------|----------|-----------------|--------------------|---------|
| <i>M. musculus</i>    | Tetrapoda      | NP_001156352     | complete | BLASTp /NCBI nr |                    | 0       |
| <i>A. melanoleuca</i> | Tetrapoda      | XP_002917318     | complete | BLASTp /NCBI nr | <i>M. musculus</i> | 6e-57   |
| <i>C. porcellus</i>   | Tetrapoda      | XP_003461608     | complete | BLASTp /NCBI nr | <i>M. musculus</i> | 1e-54   |
| <i>C. griseus</i>     | Tetrapoda      | XP_003515506     | complete | BLASTp /NCBI nr | <i>M. musculus</i> | 5e-59   |
| <i>B. taurus</i>      | Tetrapoda      | XP_001193262     | complete | BLASTp /NCBI nr | <i>M. musculus</i> | 2e-54   |
| <i>R. norvegicus</i>  | Tetrapoda      | NP_001128725     | complete | BLASTp /NCBI nr | <i>M. musculus</i> | 3e-59   |
| <i>E. caballus</i>    | Tetrapoda      | XP_003364377     | complete | BLASTp /NCBI nr | <i>M. musculus</i> | 8e-58   |
| <i>L. africana</i>    | Tetrapoda      | XP_003423236     | complete | BLASTp/NCBI nr  | <i>M. musculus</i> | 3e-46   |
| <i>S. scrofa</i>      | Tetrapoda      | NP_001193291     | complete | BLASTp /NCBI nr | <i>M. musculus</i> | 9e-56   |
| <i>O. cuniculus</i>   | Tetrapoda      | XP_002723272     | complete | BLASTp /NCBI nr | <i>M. musculus</i> | 4e-56   |
| <i>C. lupus</i>       | Tetrapoda      | XP_003431525     | complete | BLASTp /NCBI nr | <i>M. musculus</i> | 7e-57   |
| <i>S. boliviensis</i> | Tetrapoda      | XP_003932838     | complete | BLASTp /NCBI nr | <i>M. musculus</i> | 7e-53   |
| <i>M. mulatta</i>     | Tetrapoda      | NP_001180282     | complete | BLASTp /NCBI nr | <i>M. musculus</i> | 1e-53   |
| <i>O. garnettii</i>   | Tetrapoda      | XP_003783125     | complete | BLASTp /NCBI nr | <i>M. musculus</i> | 3e-56   |
| <i>P. troglodytes</i> | Tetrapoda      | XP_001156556     | complete | BLASTp /NCBI nr | <i>M. musculus</i> | 2e-52   |

|                        |           |                              |          |                         |                        |                |
|------------------------|-----------|------------------------------|----------|-------------------------|------------------------|----------------|
| <i>H. sapiens</i>      | Tetrapoda | NP_001116697                 | complete | BLASTp /NCBI nr         | <i>M. musculus</i>     | 2e-52          |
| <i>O. anatinus</i>     | Tetrapoda | XP_003430278                 | complete | BLASTp /NCBI nr         | <i>M. musculus</i>     | 2e-43          |
| <i>H. glaber</i>       | Tetrapoda | EHB03472                     | complete | BLASTp /NCBI nr         | <i>M. musculus</i>     | 9e-50          |
| <i>N. leucogenys</i>   | Tetrapoda | XP_003281537                 | partial  | BLASTp /NCBI nr         | <i>M. musculus</i>     | 2e-28          |
| <i>M. domestica</i>    | Tetrapoda | XP_003341970                 | partial  | BLASTp /NCBI nr         | <i>M. musculus</i>     | 2e-28          |
| <i>S. harrisii</i>     | Tetrapoda | XP_003770860                 | partial  | BLASTp /NCBI nr         | <i>M. musculus</i>     | 2e-28          |
| <i>M. eugenii</i>      | Tetrapoda | ENSMEUP00000004105           | partial  | tBLASTn/Ensembl genomic | <i>S. harrisii</i>     | 1.2e-38        |
| <i>O. anatinus</i>     | Tetrapoda | XP_003430278                 | complete | BLASTp /NCBI nr         | <i>G. gallus</i>       | 9e-35          |
| <i>G. gallus</i>       | Tetrapoda | XP_001231764                 | complete | BLASTp /NCBI nr         | <i>M. musculus</i>     | 5e-44          |
| <i>T. guttata</i>      | Tetrapoda | XP_002188999                 | complete | BLASTp /NCBI nr         | <i>M. musculus</i>     | 1e-24          |
| <i>M. gallopavo</i>    | Tetrapoda | XP_003202713                 | complete | BLASTp /NCBI nr         | <i>M. musculus</i>     | 4e-43          |
| <i>A. carolinensis</i> | Tetrapoda | AAWZ02027734                 | complete | tBLASTn/NCBI wsg        | <i>G. gallus</i>       | 2e-24          |
| <i>P. sinensis</i>     | Tetrapoda | AGCU01015398<br>AGCU01015399 | complete | tBLASTn/NCBI wsg        | <i>A. carolinensis</i> | 6e-26<br>4e-10 |
| <i>C. mydas</i>        | Tetrapoda | AJIM01252458                 | complete | tBLASTn/NCBI wsg        | <i>G. gallus</i>       | 7e-33          |
| <i>C. picta</i>        | Tetrapoda | AHGY01153388                 | complete | tBLASTn/NCBI wsg        | <i>G. gallus</i>       | 2e-31          |
| <i>P. molurus</i>      | Tetrapoda | AEQU010368279                | partial  | tBLASTn/NCBI wsg        | <i>A. carolinensis</i> | 1e-29          |

|                            |                |              |          |                  |                        |       |
|----------------------------|----------------|--------------|----------|------------------|------------------------|-------|
| <i>A. mississippiensis</i> | Tetrapoda      | AKHW01109662 | complete | tBLASTn/NCBI wsg | <i>A. carolinensis</i> | 5e-28 |
| <i>X. tropicalis</i>       | Tetrapoda      | XP_002939573 | complete | BLASTp /NCBI nr  | <i>M. musculus</i>     | 4e-32 |
| <i>L. chalumnea</i>        | Coelacanth     | BAHO01390606 | complete | tBLASTn/NCBI wsg | <i>A. carolinensis</i> | 3e-20 |
| <i>D. rerio</i>            | Actinopterygii | NP_001129458 | complete | BLASTp /NCBI nr  | <i>M. musculus</i>     | 3e-12 |
| <i>O. niloticus</i>        | Actinopterygii | XP_003445882 | complete | BLASTp /NCBI nr  | <i>M. musculus</i>     | 3e-13 |
| <i>T. nigroviridis</i>     | Actinopterygii | CAG10121     | partial  | BLASTp /NCBI nr  | <i>M. musculus</i>     | 3e-15 |
| <i>O. latipes</i>          | Actinopterygii | FS547734     | complete | tBLASTn/NCBI est | <i>O. niloticus</i>    | 4e-34 |
| <i>P. flavescens</i>       | Actinopterygii | GO658805     | complete | tBLASTn/NCBI est | <i>O. niloticus</i>    | 2e-33 |
| <i>H. hippoglossus</i>     | Actinopterygii | FD698650     | complete | tBLASTn/NCBI est | <i>O. niloticus</i>    | 1e-20 |
| <i>R. rutilus</i>          | Actinopterygii | EG545621     | complete | tBLASTn/NCBI est | <i>O. niloticus</i>    | 3e-17 |
| <i>I. punctatus</i>        | Actinopterygii | CK419473     | complete | tBLASTn/NCBI est | <i>O. niloticus</i>    | 3e-17 |
| <i>T. thynnus</i>          | Actinopterygii | EG630239     | partial  | tBLASTn/NCBI est | <i>O. niloticus</i>    | 2e-16 |

---
