# Supplementary material
Source: PubMed Central journal article supplement (PMC3813864)
Supplement: bdd71a7fb1d0c0b4ae7f4f7be066ab5c_genetics.113.156679-3.pdf [file bdd71a7fb1d0c0b4ae7f4f7be066ab5c_genetics.113.156679-3.pdf]

**Table S1 Origin of the SYCE2 homologues**

| Species name          | Taxonomic rank | Accession number | sequence | Method/database | seed               | E-value |
|-----------------------|----------------|------------------|----------|-----------------|--------------------|---------|
| <i>M. musculus</i>    | Tetrapoda      | NP_082230        | complete | BLASTp/ NCBI nr |                    | 0       |
| <i>P. paniscus</i>    | Tetrapoda      | XP_003814885     | complete | BLASTp /NCBI nr | <i>M. musculus</i> | 1e-70   |
| <i>R. norvegicus</i>  | Tetrapoda      | EDL92193         | complete | BLASTp /NCBI nr | <i>M. musculus</i> | 5e-123  |
| <i>H. sapiens</i>     | Tetrapoda      | NP_001099048     | complete | BLASTp /NCBI nr | <i>M. musculus</i> | 1e-70   |
| <i>P. troglodytes</i> | Tetrapoda      | XP_001155819     | complete | BLASTp /NCBI nr | <i>M. musculus</i> | 1e-70   |
| <i>P. abelii</i>      | Tetrapoda      | XP_002828793     | complete | BLASTp /NCBI nr | <i>M. musculus</i> | 4e-71   |
| <i>P. anubis</i>      | Tetrapoda      | XP_003915053     | complete | BLASTp /NCBI nr | <i>M. musculus</i> | 5e-70   |
| <i>N. leucogenys</i>  | Tetrapoda      | XP_003256956     | complete | BLASTp /NCBI nr | <i>M. musculus</i> | 2e-70   |
| <i>L. africana</i>    | Tetrapoda      | XP_003413389     | complete | BLASTp /NCBI nr | <i>M. musculus</i> | 8e-75   |
| <i>S. boliviensis</i> | Tetrapoda      | XP_003941778     | complete | BLASTp /NCBI nr | <i>M. musculus</i> | 2e-69   |
| <i>C. jacchus</i>     | Tetrapoda      | XP_002761833     | complete | BLASTp /NCBI nr | <i>M. musculus</i> | 1e-66   |
| <i>C. lupus</i>       | Tetrapoda      | XP_542039        | complete | BLASTp /NCBI nr | <i>M. musculus</i> | 2e-73   |
| <i>B. taurus</i>      | Tetrapoda      | DAA28039         | complete | BLASTp /NCBI nr | <i>M. musculus</i> | 4e-74   |
| <i>M. mulatta</i>     | Tetrapoda      | XP_002801138     | complete | BLASTp /NCBI nr | <i>M. musculus</i> | 1e-54   |
| <i>C. porcellus</i>   | Tetrapoda      | XP_003468209     | complete | BLASTp /NCBI nr | <i>M. musculus</i> | 7e-58   |

|                            |           |                    |          |                   |                        |         |
|----------------------------|-----------|--------------------|----------|-------------------|------------------------|---------|
| <i>O. cuniculus</i>        | Tetrapoda | XP_002724280       | complete | BLASTp /NCBI nr   | <i>M. usculus</i>      | 1e-64   |
| <i>S. scrofa</i>           | Tetrapoda | XP_003480827       | complete | BLASTp /NCBI nr   | <i>M. musculus</i>     | 4e-63   |
| <i>C. griseus</i>          | Tetrapoda | EGW00612           | partial  | BLASTp /NCBI nr   | <i>M. musculus</i>     | 2e-45   |
| <i>A. melanoleuca</i>      | Tetrapoda | EFB28619           | Complete | BLASTp /NCBI nr   | <i>M. musculus</i>     | 4e-65   |
| <i>M. putorius</i>         | Tetrapoda | AES07688           | Complete | BLASTp /NCBI nr   | <i>M. musculus</i>     | 2e-64   |
| <i>O. garnettii</i>        | Tetrapoda | XP_003798068       | partial  | BLASTp /NCBI nr   | <i>M. musculus</i>     | 1e-39   |
| <i>M. domestica</i>        | Tetrapoda | XP_001377747       | complete | BLASTp /NCBI nr   | <i>M. musculus</i>     | 6e-57   |
| <i>S. harrisii</i>         | Tetrapoda | XP_003760717       | complete | BLASTp /NCBI nr   | <i>M. musculus</i>     | 4e-56   |
| <i>M. eugenii</i>          | Tetrapoda | ABQO021047289      | partial  | tBLASTn/NCBI wgs  | <i>S. harrisii</i>     | 3e-41   |
| <i>O. anatinus</i>         | Tetrapoda | ENSOANP00000014450 | partial  | BLASTp/UniProtKB  | <i>M. musculus</i>     | 2x10-5  |
| <i>G. gallus</i>           | Tetrapoda | XP_003643433       | complete | BLASTp /NCBI nr   | <i>M. musculus</i>     | 1e-37   |
| <i>T. guttata</i>          | Tetrapoda | XP_002194928       | partial  | BLASTp /NCBI nr   | <i>M. musculus</i>     | 4e-15   |
| <i>A. carolinensis</i>     | Tetrapoda | XP_003216437       | complete | BLASTp /NCBI nr   | <i>M. musculus</i>     | 6e-36   |
| <i>P. sinensis</i>         | Tetrapoda | ENSPSIP00000014147 | partial  | BLASTp/ UniProtKB | <i>A. carolinensis</i> | 9x10-31 |
| <i>P. molurus</i>          | Tetrapoda | AEQU010394814      | partial  | tBLASTn/NCBI wgs  | <i>A. carolinensis</i> | 3e-30   |
| <i>A. mississippiensis</i> | Tetrapoda | AKHW01024067       | partial  | tBLASTn/NCBI wgs  | <i>A. carolinensis</i> | 2e-18   |

|                        |                 |                            |          |                                       |                                        |         |
|------------------------|-----------------|----------------------------|----------|---------------------------------------|----------------------------------------|---------|
| <i>C. mydas</i>        | Tetrapoda       | EMP37242                   | complete | BLASTp /NCBI nr                       | <i>A. carolinensis</i>                 | 3e-23   |
| <i>C. picta</i>        | Tetrapoda       | AHGY01185898               | partial  | tBLASTn/NCBI wgs                      | <i>A. carolinensis</i>                 | 1e-21   |
| <i>X. tropicalis</i>   | Tetrapoda       | XP_002939167               | partial  | BLASTp /NCBI nr                       | <i>M. musculus</i>                     | 1e-19   |
| <i>L. chalumnae</i>    | Coelacanth      | AFYH01158832               | partial  | tBLASTn/NCBI wgs                      | <i>A. carolinensis</i>                 | 8e-17   |
| <i>D. rerio</i>        | Actinopterygii  | NP_001018339               | complete | BLASTp /NCBI nr                       | <i>M. musculus</i>                     | 2e-11   |
| <i>O. mykiss</i>       | Actinopterygii  | BX_298349                  | complete | tBLASTn/Gene Indices                  | <i>D. rerio</i>                        | 1,6e-44 |
| <i>O. latipes</i>      | Actinopterygii  | FS528043                   | complete | tBLASTn/Gene Indices                  | <i>D. rerio</i>                        | 1,1e-22 |
| <i>O. niloticus</i>    | Actinopterygii  | XP_003453800               | complete | BLASTp /NCBI nr                       | <i>M. musculus</i>                     | 2e-06   |
| <i>T. nigroviridis</i> | Actinopterygii  | CAG03308                   | complete | BLASTp /NCBI nr                       | <i>M. musculus</i>                     | 6e-10   |
| <i>B. floridae</i>     | Cephalochordata | XP_002591412               | complete | BLASTp /NCBI nr                       | <i>M. musculus</i>                     | 8e-15   |
| <i>C. savignyi</i>     | Tunicata        | BW516106                   | complete | tBLASTn/NCBI est                      | <i>H. diversicolor</i>                 | 2e-09   |
| <i>C. intestinalis</i> | Tunicata        | XP_002130896               | complete | BLASTp /NCBI nr                       | <i>M. musculus</i>                     | 0,008   |
| <i>P. misakiensis</i>  | Tunicata        | AU036426                   | complete | tBLASTn/NCBI est                      | <i>H. diversicolor</i>                 | 2e-06   |
| <i>S. purpuratus</i>   | Echinodermata   | XP_003726746               | complete | BLASTp /NCBI nr                       | <i>M. musculus</i>                     | 1e-13   |
| <i>A. pompejana</i>    | Annelida        | GO169636                   | complete | tBLASTn/NCBI est                      | <i>L. gigantea</i>                     | 2e-14   |
| <i>C. teleta</i>       | Annelida        | Jgi 210482<br>AMQN01004103 | complete | Blastp/InParanoid<br>tBLASTn/NCBI wgs | <i>M. musculus</i><br><i>C. teleta</i> | 4,9e-06 |

|                          |           |                            |          |                                       |                                          |         |
|--------------------------|-----------|----------------------------|----------|---------------------------------------|------------------------------------------|---------|
| <i>S. nudus</i>          | Annelida  | FR768618                   | complete | tBLASTn/NCBI est                      | <i>L. gigantea</i>                       | 2e-23   |
| <i>L. stagnalis</i>      | Mollusca  | ES573602                   | complete | tBLASTn/NCBI est                      | <i>L. gigantea</i>                       | 1e-09   |
| <i>L. gigantea</i>       | Mollusca  | jgi 158004<br>AMQO01001743 | complete | Blastp/InParanoid<br>tBLASTn/NCBI wgs | <i>M. musculus</i><br><i>L. gigantea</i> | 1,8e-08 |
| <i>C. gigas</i>          | Mollusca  | EKC37702                   | complete | BLASTp /NCBI nr                       | <i>M. musculus</i>                       | 1e-04   |
| <i>H. diversicolor</i>   | Mollusca  | GT866818                   | complete | tBLASTn/NCBI est                      | <i>L. gigantea</i>                       | 2e-32   |
| <i>D. pulex</i>          | Crustacea | EFX69051                   | complete | Hmmsearch/NCBI est                    | <i>hmmprofil</i>                         | 0,023   |
| <i>H. magnipapillata</i> | Cnidaria  | XP_002165182               | complete | BLASTp /NCBI nr                       | <i>M. musculus</i>                       | 5e-06   |
| <i>N. vectensis</i>      | Cnidaria  | XP_001625149               | complete | BLASTp /NCBI nr                       | <i>M. musculus</i>                       | 2e-11   |

---
