# Supplementary material
Source: PubMed Central journal article supplement (PMC3813864)
Supplement: fee294093e0b4a3514312bc3bd1545f0_genetics.113.156679-6.pdf [file fee294093e0b4a3514312bc3bd1545f0_genetics.113.156679-6.pdf]

**Table S3 Origin of the SYCE1 homologues**

| Species name          | Taxonomic rank | Accession number | sequence | Method/database | seed               | E-value |
|-----------------------|----------------|------------------|----------|-----------------|--------------------|---------|
| <i>M. musculus</i>    | Tetrapoda      | NP_001137237     | complete | BLASTp/NCBI nr  |                    | 0       |
| <i>R. norvegicus</i>  | Tetrapoda      | NP_001020229     | complete | BLASTp /NCBI nr | <i>M. musculus</i> | 0       |
| <i>H. sapiens</i>     | Tetrapoda      | NP_001137236     | complete | BLASTp/NCBI nr  | <i>M. musculus</i> | 7e-119  |
| <i>P. troglodytes</i> | Tetrapoda      | XP_001146521     | complete | BLASTp /NCBI nr | <i>M. musculus</i> | 1e-117  |
| <i>P. abelii</i>      | Tetrapoda      | XP_002821352     | complete | BLASTp /NCBI nr | <i>M. musculus</i> | 1e-120  |
| <i>C. porcellus</i>   | Tetrapoda      | XP_003479623     | complete | BLASTp/NCBI nr  | <i>M. musculus</i> | 2e-144  |
| <i>N. leucogenys</i>  | Tetrapoda      | XP_003275547     | complete | BLASTp /NCBI nr | <i>M. musculus</i> | 6e-117  |
| <i>P. paniscus</i>    | Tetrapoda      | XP_003805584     | complete | BLASTp /NCBI nr | <i>M. musculus</i> | 2e-115  |
| <i>A. melanoleuca</i> | Tetrapoda      | XP_002928741     | complete | BLASTp /NCBI nr | <i>M. musculus</i> | 1e-138  |
| <i>C. griseus</i>     | Tetrapoda      | XP_003514379     | complete | BLASTp /NCBI nr | <i>M. musculus</i> | 4e-169  |
| <i>L. africana</i>    | Tetrapoda      | XP_003423552     | complete | BLASTp /NCBI nr | <i>M. musculus</i> | 3e-122  |
| <i>M. mulatta</i>     | Tetrapoda      | XP_002805923     | complete | BLASTp /NCBI nr | <i>M. musculus</i> | 4e-116  |
| <i>E. caballus</i>    | Tetrapoda      | XP_001497316     | complete | BLASTp /NCBI nr | <i>M. musculus</i> | 1e-126  |
| <i>P. anubis</i>      | Tetrapoda      | XP_003904501     | complete | BLASTp /NCBI nr | <i>M. musculus</i> | 2e-120  |
| <i>O. cuniculus</i>   | Tetrapoda      | XP_002718820     | complete | BLASTp /NCBI nr | <i>M. musculus</i> | 2e-123  |

|                        |            |                    |          |                   |                        |         |
|------------------------|------------|--------------------|----------|-------------------|------------------------|---------|
| <i>B. taurus</i>       | Tetrapoda  | NP_001033238       | complete | BLASTp /NCBI nr   | <i>M. musculus</i>     | 5e-128  |
| <i>C. lupus</i>        | Tetrapoda  | XP_537943          | complete | BLASTp /NCBI nr   | <i>M. musculus</i>     | 4e-144  |
| <i>O. garnettii</i>    | Tetrapoda  | XP_003803715       | complete | BLASTp /NCBI nr   | <i>M. musculus</i>     | 7e-140  |
| <i>M. fascicularis</i> | Tetrapoda  | Q4R7J8             | complete | BLASTp /NCBI nr   | <i>M. musculus</i>     | 3e-101  |
| <i>H. glaber</i>       | Tetrapoda  | EHB13133           | complete | BLASTp /NCBI nr   | <i>M. musculus</i>     | 1e-94   |
| <i>M. domestica</i>    | Tetrapoda  | ADB77889           | complete | BLASTp /NCBI nr   | <i>M. musculus</i>     | 4e-55   |
| <i>S. harrisii</i>     | Tetrapoda  | ENSSHAP00000009845 | partial  | BLASTp /UniProtKB | <i>M. domestica</i>    | 1x10-52 |
| <i>M. eugenii</i>      | Tetrapoda  | FY576800           | complete | tBLASTn/NCBI est  | <i>M. domestica</i>    | 7e-109  |
| <i>S. boliviensis</i>  | Tetrapoda  | XP_003938136       | complete | BLASTp /NCBI nr   | <i>M. musculus</i>     | 3e-38   |
| <i>C. jacchus</i>      | Tetrapoda  | XP_003735392       | complete | BLASTp /NCBI nr   | <i>M. musculus</i>     | 2e-39   |
| <i>O. anatinus</i>     | Tetrapoda  | ENSOANP00000022990 | complete | BLASTp/ UniProtKB | <i>M. domestica</i>    | 4x10-76 |
| <i>A. carolinensis</i> | Tetrapoda  | XP_003216702       | complete | BLASTp /NCBI nr   | <i>M. musculus</i>     | 5e-44   |
| <i>C. mydas</i>        | Tetrapoda  | EMP26554           | partial  | BLASTp/NCBI nr    | <i>A. carolinensis</i> | 6e-33   |
| <i>P. sinensis</i>     | Tetrapoda  | ENSPSIP00000010027 | partial  | BLASTp/UniProtKB  | <i>A. carolinensis</i> | 2x10-38 |
| <i>X. tropicalis</i>   | Tetrapoda  | XP_002943661       | complete | BLASTp /NCBI nr   | <i>M. musculus</i>     | 3e-20   |
| <i>L. chalumnea</i>    | Coelacanth | H3ALY1             | complete | Hmmsearch/UniProt | <i>hmmprofil</i>       | 8,7e-77 |

|                         |                 |                            |          |                                       |                                          |       |
|-------------------------|-----------------|----------------------------|----------|---------------------------------------|------------------------------------------|-------|
| <i>P. reticulata</i>    | Actinopterygii  | ES386322                   | complete | tBLASTn/NCBI est                      | <i>O. latipes</i>                        | 2e-49 |
| <i>R. rutilus</i>       | Actinopterygii  | EG545611                   | complete | tBLASTn/NCBI est                      | <i>O. latipes</i>                        | 3e-36 |
| <i>I. punctatus</i>     | Actinopterygii  | CK426085                   | complete | tBLASTn/NCBI est                      | <i>O. latipes</i>                        | 3e-31 |
| <i>P. promelas</i>      | Actinopterygii  | DT113652                   | partial  | tBLASTn/NCBI est                      | <i>O. latipes</i>                        | 2e-23 |
| <i>S. maximus</i>       | Actinopterygii  | HQ603845                   | partial  | tBLASTn/NCBI est                      | <i>O. latipes</i>                        | 3e-23 |
| <i>P. maniculatus</i>   | Actinopterygii  | GH530402                   | complete | tBLASTn/NCBI est                      | <i>O. latipes</i>                        | 3e-09 |
| <i>O. niloticus</i>     | Actinopterygii  | XP_003444205               | complete | BLASTp /NCBI nr                       | <i>M. musculus</i>                       | 1e-17 |
| <i>D. rerio</i>         | Actinopterygii  | XP_694355                  | complete | tBLASTn/NCBI est                      | <i>M. musculus</i>                       | 5e-14 |
| <i>O. latipes</i>       | Actinopterygii  | XP_004074263               | complete | BLASTp/NCBI nr                        | <i>D. rerio</i>                          | 1e-32 |
| <i>B. floridae</i>      | Cephalochordata | XP_002592847               | complete | tBLASTn/NCBI nr                       | <i>O. latipes</i>                        | 0,16  |
| <i>A. pectinifera</i>   | Echinodermata   | DB424359                   | complete | tBLASTn/NCBI est                      | <i>L. gigantea</i>                       | 1e-12 |
| <i>C. teleta</i>        | Annelida        | AMQN01011277               | complete | tBLASTn/NCBI wsg                      | <i>L. gigantea</i>                       | 2e-12 |
| <i>M. californianus</i> | Mollusca        | ES407417                   | partial  | tBLASTn/NCBI est                      | <i>B. floridae</i>                       | 1e-10 |
| <i>L. gigantea</i>      | Mollusca        | jgi 156257<br>AMQQ01001205 | complete | Blastp/InParanoid<br>tBLASTn/NCBI wsg | <i>M. musculus</i><br><i>L. gigantea</i> | <0,01 |
| <i>C. gigas</i>         | Mollusca        | AM858590                   | complete | tBLASTn/NCBI est                      | <i>L. gigantea</i>                       | 3e-48 |
